# Supplementary material for: Distinct representation of cue-outcome association by D1 and D2 neurons in the ventral striatum’s olfactory tubercle
Source: PubMed Central journal article supplement (PMC9203051; doi:10.7554/elife.75463), 2022-06-16
Supplement: elife-75463-transrepform1.pdf [file elife-75463-transrepform1.pdf]

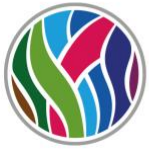

## eLife's transparent reporting form

We encourage authors to provide detailed information *within their submission* to facilitate the interpretation and replication of experiments. Authors can upload supporting documentation to indicate the use of appropriate reporting guidelines for health-related research (see [EQUATOR Network](#)), life science research (see the [BioSharing Information Resource](#)), or the [ARRIVE guidelines](#) for reporting work involving animal research. Where applicable, authors should refer to any relevant reporting standards documents in this form.

If you have any questions, please consult our Journal Policies and/or contact us: [editorial@elifesciences.org](mailto:editorial@elifesciences.org).

### Sample-size estimation

- You should state whether an appropriate sample size was computed when the study was being designed
- You should state the statistical method of sample size computation and any required assumptions
- If no explicit power analysis was used, you should describe how you decided what sample (replicate) size (number) to use

Please outline where this information can be found within the submission (e.g., sections or figure legends), or explain why this information doesn't apply to your submission:

Sample sizes are reported in the Materials & Methods section, as well as throughout the paper whenever numbers are reported for results. Sample sizes (number of mice and number of neurons recorded) were determined by standards in the field.

### Replicates

- You should report how often each experiment was performed
- You should include a definition of biological versus technical replication
- The data obtained should be provided and sufficient information should be provided to indicate the number of independent biological and/or technical replicates
- If you encountered any outliers, you should describe how these were handled
- Criteria for exclusion/inclusion of data should be clearly stated
- High-throughput sequence data should be uploaded before submission, with a private link for reviewers provided (these are available from both GEO and ArrayExpress)

Please outline where this information can be found within the submission (e.g., sections or figure legends), or explain why this information doesn't apply to your submission:

Details of number of experiments (number of mice, number of neurons etc) are reported in the Materials & Methods section as well as throughout the paper where numbers are reported for results. Any cases where imaging data was excluded due to anatomical mislocalization of the lens, insufficient calcium transients, or trials were excluded are described in the Methods section with the criteria stated.

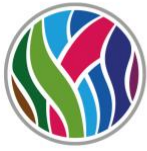

### Statistical reporting

- Statistical analysis methods should be described and justified
- Raw data should be presented in figures whenever informative to do so (typically when N per group is less than 10)
- For each experiment, you should identify the statistical tests used, exact values of N, definitions of center, methods of multiple test correction, and dispersion and precision measures (e.g., mean, median, SD, SEM, confidence intervals; and, for the major substantive results, a measure of effect size (e.g., Pearson's  $r$ , Cohen's  $d$ ))
- Report exact p-values wherever possible alongside the summary statistics and 95% confidence intervals. These should be reported for all key questions and not only when the p-value is less than 0.05.

Please outline where this information can be found within the submission (e.g., sections or figure legends), or explain why this information doesn't apply to your submission:

Statistics are reported each time numbers are reported for results, and the tests used are indicated in the Materials & Methods. Raw data is presented along with the averages in the imaging and behavioral results figures where it was possible to do so.

### Group allocation

- Indicate how samples were allocated into experimental groups (in the case of clinical studies, please specify allocation to treatment method); if randomization was used, please also state if restricted randomization was applied
- Indicate if masking was used during group allocation, data collection and/or data analysis

Please outline where this information can be found within the submission (e.g., sections or figure legends), or explain why this information doesn't apply to your submission:

No masking or blinding was used, because there were no instances where experimenter bias was able to change the results of the experiments. No sample allocation was necessary.

### Additional data files ("source data")

- We encourage you to upload relevant additional data files, such as numerical data that are represented as a graph in a figure, or as a summary table
- Where provided, these should be in the most useful format, and they can be uploaded as "Source data" files linked to a main figure or table
- Include model definition files including the full list of parameters used
- Include code used for data analysis (e.g., R, MatLab)
- Avoid stating that data files are "available upon request"

Please indicate the figures or tables for which source data files have been provided:

Raw data, source data, metadata, and analysis code have been uploaded into Dryad linked to this manuscript. The source data of computed individual neuron trial average activity and variance is provided in .mat files, which is then further processed in the provided matlab code to generate the figures.  
[https://datadryad.org/stash/share/ZFZnvV4mJl\\_XhTBHrNhDjtyapa8cHo8jb9ZrW5noEjY](https://datadryad.org/stash/share/ZFZnvV4mJl_XhTBHrNhDjtyapa8cHo8jb9ZrW5noEjY)
